# Supplementary material for: Cross-Contamination as a Problem in Collection and Analysis of Environmental Samples Containing Microplastics—A Review
Source: MDPI journal article supplement (doi:10.3390/su132112123), 2021-11-03

## Supplementary Material

**Figure S1.** Number of publications (annually) concerning MP analysis in the water environment in total (grey) compared to publications employing latex or nitrile gloves (black).

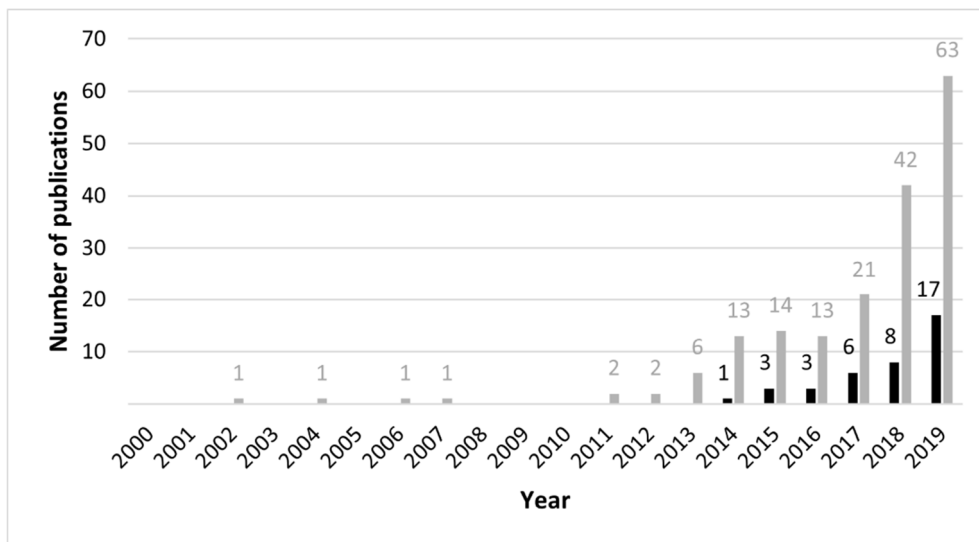

**Figure S2.** Number of publications (annually) concerning MP analysis in the water environment in total (grey) compared to publications employing laboratory coats (black).

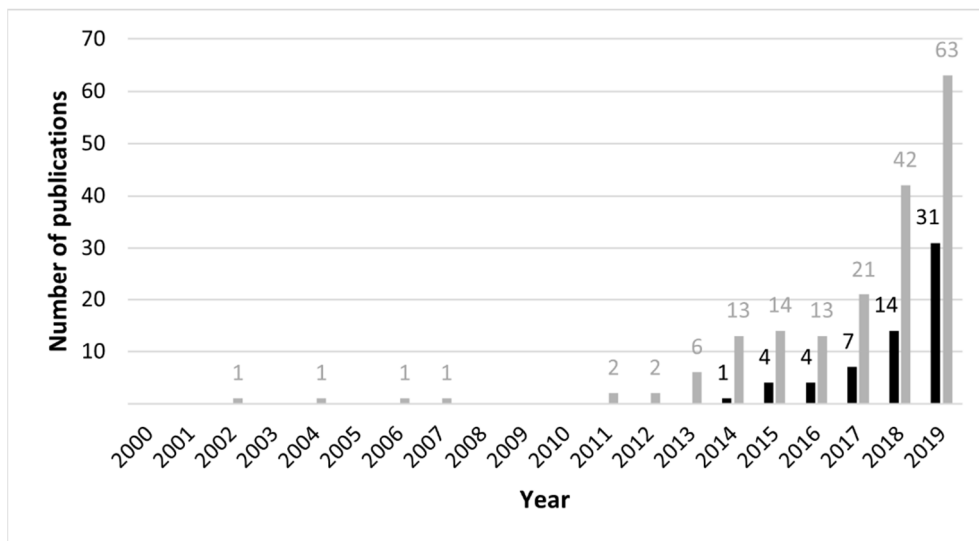

**Figure S3.** Number of publications (annually) concerning MP analysis in the water environment in total (grey) compared to publications employing fume hoods or laminar flow cabinets (black).

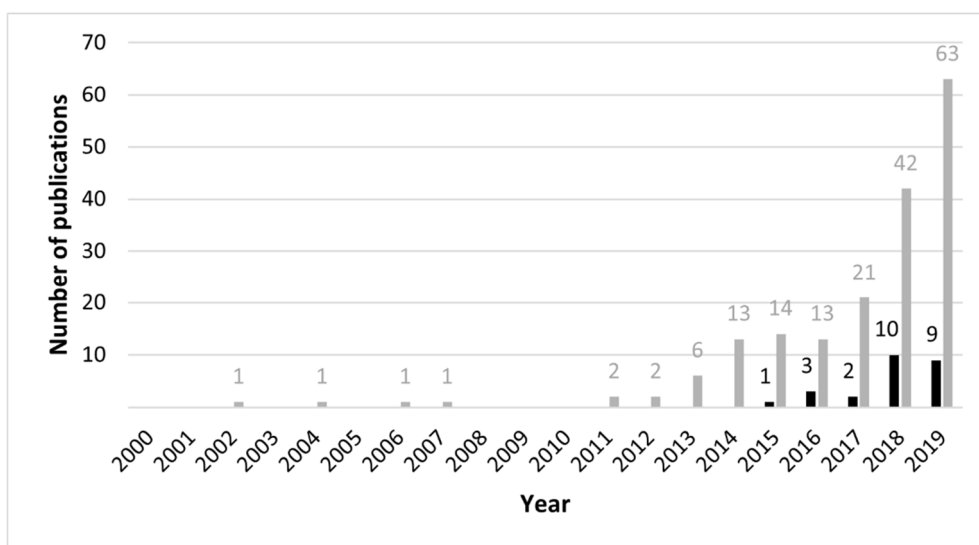

**Figure S4.** Number of publications (annually) concerning MP analysis in the water environment in total (grey) compared to publications employing covering samples or laboratory equipment with aluminium foil or other non-plastic covers (black).

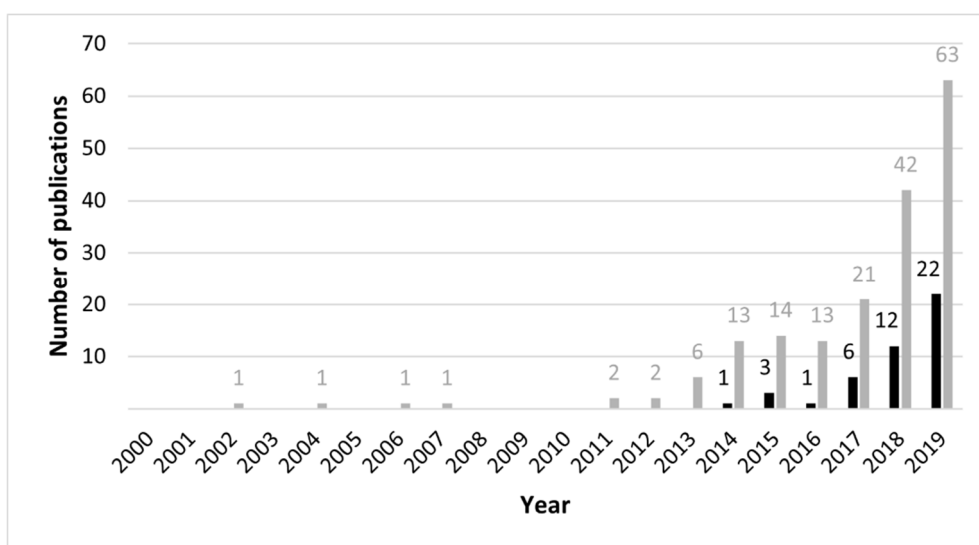

**Figure S5.** Number of publications (annually) concerning MP analysis in the water environment in total (grey) compared to publications employing polymer-free clothing (black).

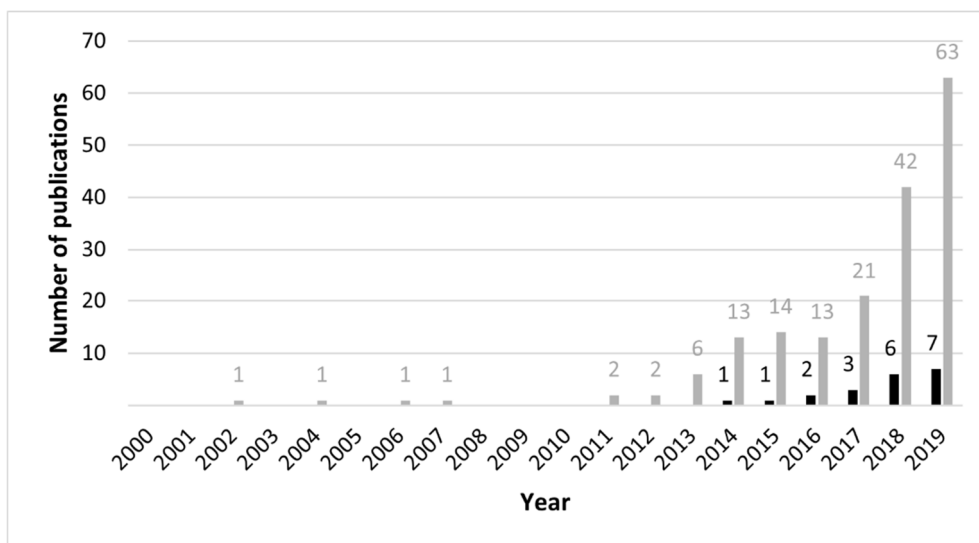

**Figure S6.** Number of publications (annually) concerning MP analysis in the water environment in total (grey) compared to publications employing washing glassware or laboratory equipment several times in a row prior to use (black).

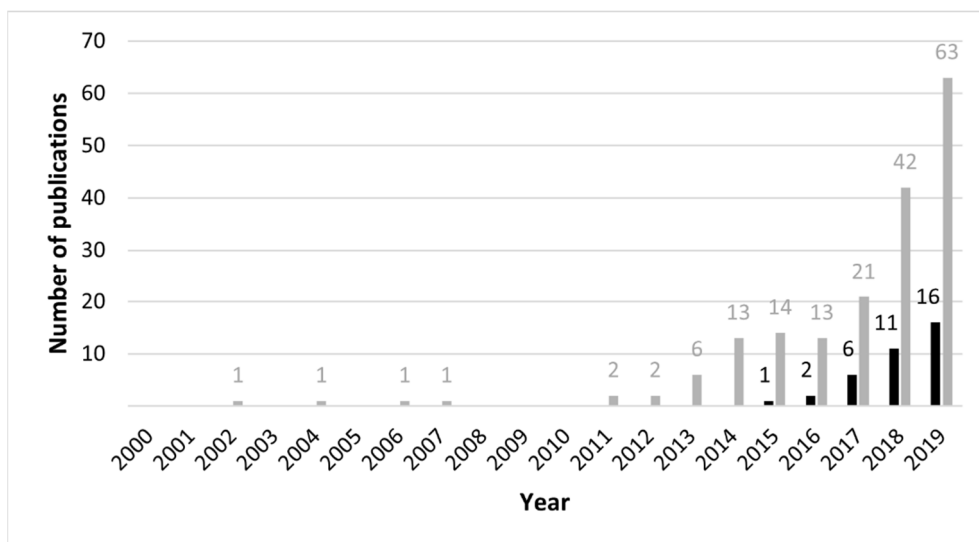

**Figure S7.** Number of publications (annually) concerning MP analysis in the water environment in total (grey) compared to publications employing filtration of chemical reagents (e.g. H<sub>2</sub>O<sub>2</sub>) before use (black).

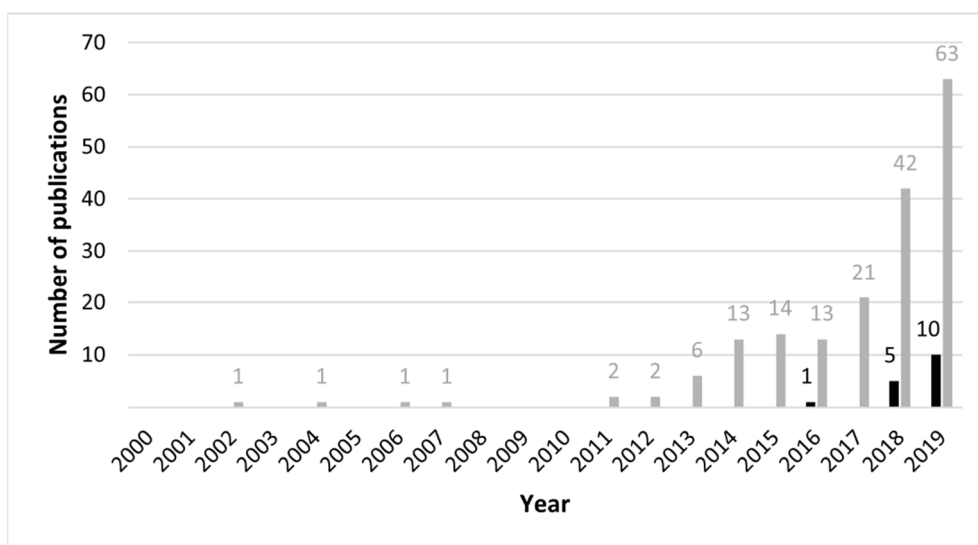

**Figure S8.** Number of publications (annually) concerning MP analysis in the water environment in total (grey) compared to publications employing sterilization of glassware or laboratory tools before use (black).

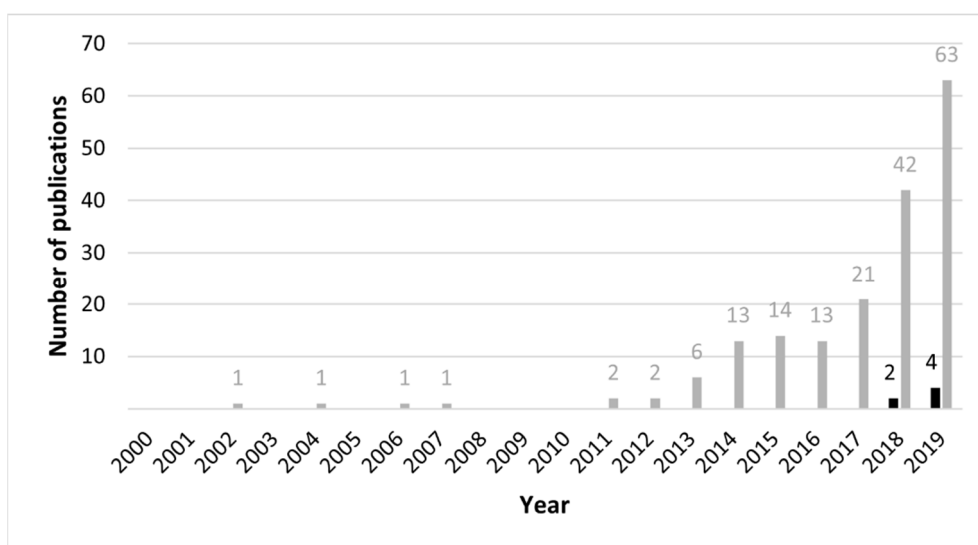

**Figure S9.** Number of publications (annually) concerning MP analysis in the water environment in total (grey) compared to publications employing washing glassware or laboratory equipment with agents other than water, such as alcohol, acids or special detergents (black).

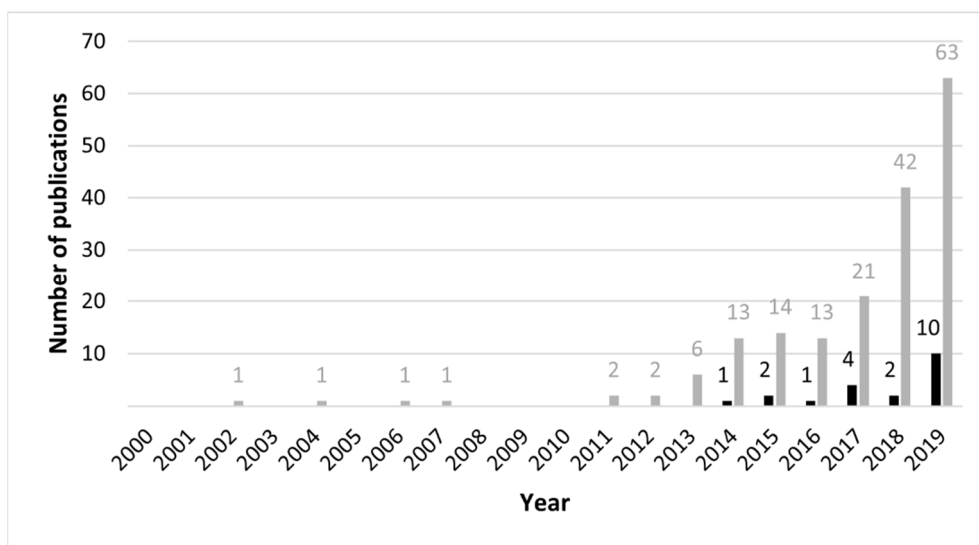

**Figure S10.** Number of publications (annually) concerning MP analysis in the water environment in total (grey) compared to publications employing the use of equipment made of materials other than plastic, e.g. glass, whenever possible (black).

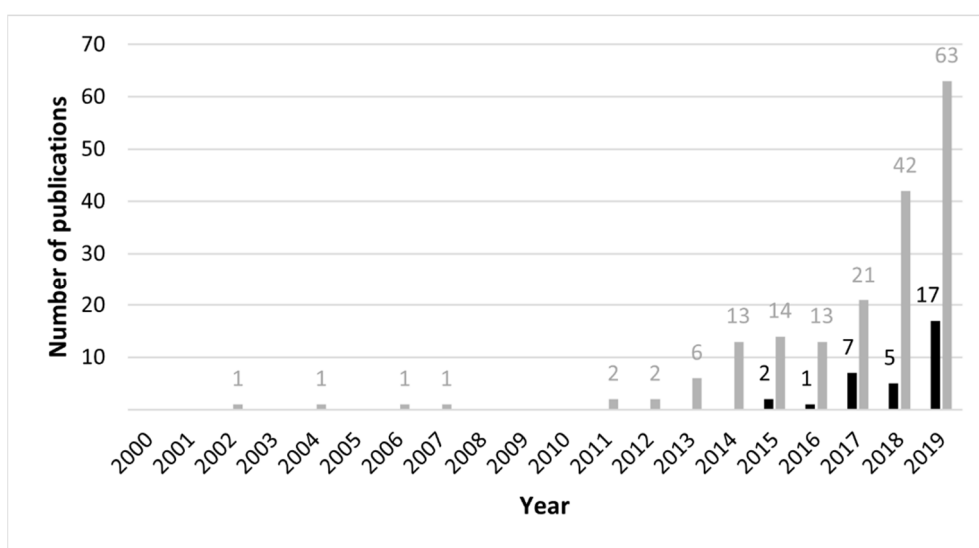

Supplement: s1 [file s1]
