# Supplementary material for: Cross-Contamination as a Problem in Collection and Analysis of Environmental Samples Containing Microplastics—A Review
Source: MDPI journal article supplement (doi:10.3390/su132112123), 2021-11-03
Supplement: s1 [file s1]

Archive with 1 entries (1 files):
- sustainability-1405991-supplementary.pdf
